# Supplementary material for: Long-term HEV carriers without antibody seroconversion among eligible immunocompetent blood donors
Source: PubMed Central journal article supplement (PMC6033859; doi:10.1038/s41426-018-0125-y), 2018-07-05
Supplement: 41426_2018_125_MOESM1_ESM.pdf [file 41426_2018_125_MOESM1_ESM.pdf]

1 The concordance between the HEV RNA, HEV antigen, and anti-HEV IgM values  
 2 was calculated using the Kappa test.

3 Table S1. Analyses of consistency between assays using the kappa index

|            |          | HEV Ag   |          |       | Kappa                     | Anti-HEV IgM |          |       | Kappa                     |
|------------|----------|----------|----------|-------|---------------------------|--------------|----------|-------|---------------------------|
|            |          | Positive | Negative | Total | (95%<br>CI)               | Positive     | Negative | Total | (95%<br>CI)               |
| HEV<br>RNA | Positive | 11       | 4        | 15    | 0.73<br>(0.55-<br>0.91) * | 0            | 15       | 15    | 0.00 (-<br>0.01-<br>0.00) |
|            | Negative | 4        | 5326     | 5330  |                           | 38           | 5292     | 5330  |                           |
|            | Total    | 15       | 5330     | 5345  |                           | 38           | 5307     | 5345  |                           |
| HEV<br>IgM | Positive | 0        | 38       | 38    | 0.00 (-<br>0.01-<br>0.00) |              |          |       |                           |
|            | Negative | 15       | 5292     | 5307  |                           |              |          |       |                           |
|            | Total    | 15       | 5330     | 5345  |                           |              |          |       |                           |

4 \* p<0.01

5

6

7

Table S2. Characteristics of the donors with negative conversion of both HEV antigen and RNA

| c  | Age <sup>a</sup> | Sex <sup>b</sup> | Career <sup>c</sup> | Sample | Days              | RNA<br>(copies/mL) <sup>d</sup> | HEV Ag<br>(S/CO) <sup>e</sup> | Anti-HEV<br>IgM (S/CO) <sup>e</sup> | Anti-HEV IgG<br>(WU/mL) <sup>f</sup> |
|----|------------------|------------------|---------------------|--------|-------------------|---------------------------------|-------------------------------|-------------------------------------|--------------------------------------|
|    |                  |                  |                     |        | post-<br>donation |                                 |                               |                                     |                                      |
| 11 | 46               | M                | Office clerk        | 11-1   | 1                 | 2.78E+04                        | 2.508                         | 0.165                               | 0.039                                |
|    |                  |                  |                     | 11-2   | 21                | neg                             | 1.967                         | 0.031                               | 0.039                                |
|    |                  |                  |                     | 11-3   | 202               | neg                             | 0.467                         | 0.004                               | 0.039                                |
| 12 | 33               | M                | Office clerk        | 12-1   | 1                 | 2.64E+04                        | 1.042                         | 0.069                               | 0.326                                |
|    |                  |                  |                     | 12-2   | 85                | neg                             | 0.617                         | 0.188                               | 0.210                                |
| 13 | 23               | F                | Student             | 13-1   | 1                 | 9.27E+02                        | 1.900                         | 0.027                               | 0.039                                |
|    |                  |                  |                     | 13-2   | 70                | neg                             | 0.608                         | 0.019                               | 0.039                                |
| 14 | 24               | M                | Others              | 14-1   | 1                 | 1.93E+05                        | 1.467                         | 0.062                               | 0.039                                |
|    |                  |                  |                     | 14-2   | 217               | neg                             | 0.375                         | 0.054                               | 0.039                                |
| 15 | 23               | F                | Others              | 15-1   | 1                 | 6.80E+04                        | 1.075                         | 0.031                               | 0.039                                |
|    |                  |                  |                     | 15-2   | 72                | neg                             | 0.117                         | 0.121                               | 0.039                                |
| 16 | 36               | M                | Office clerk        | 16-1   | 1                 | 3.26E+04                        | 5.033                         | 0.038                               | 0.039                                |
|    |                  |                  |                     | 16-2   | 95                | neg                             | 0.067                         | 0.015                               | 0.039                                |
| 17 | 23               | M                | Student             | 17-1   | 1                 | 2.77E+05                        | 1.042                         | 0.038                               | 0.039                                |
|    |                  |                  |                     | 17-2   | 142               | neg                             | 0.683                         | 0.027                               | 0.039                                |

8 <sup>a</sup> Age at time of donation; <sup>b</sup> Sex: F: female; M: male.

9   <sup>c</sup> Potential careers included farmer, worker, office clerk, civil servant, student, teacher, doctor, other health worker,  
10 business staff, and other, with unemployed, self-employed, and housewife included in the “others” category.

11   <sup>d</sup> "neg" indicates negative for HEV RNA detection.

12   <sup>e</sup> S/CO: signal to cut-off ratios. Values of S/CO  $\geq 1$  were identified as positive.

13   <sup>f</sup> WU/mL: WHO units/mL. The levels of anti-HEV IgG in samples that were negative for anti-HEV IgG detection were set  
14 as 0.039 WU/mL.

15

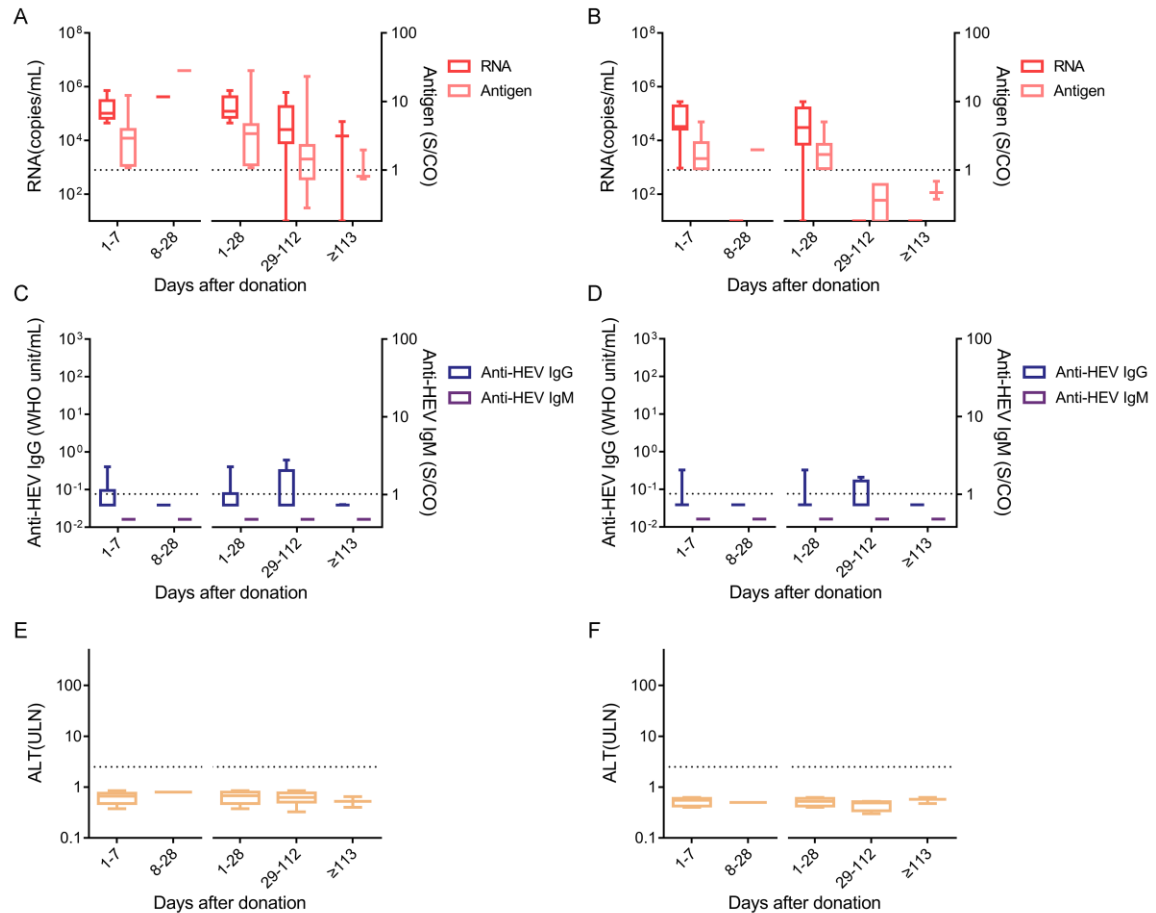

16

17 Figure S1. Dynamics of the HEV pathogen (RNA and antigen) (A and B), anti-  
 18 HEV antibodies (IgM and IgG) (C, D), and ALT levels (E and F) among 10 donors  
 19 with long-term HEV viremia and/or antigenemia (left panel) and 7 donors who  
 20 cleared the virus (right panel) during the follow-up period. Samples were  
 21 collected from 10 donors who presented with long-term HEV viremia and/or  
 22 antigenemia from 1 to 7 days (n = 10), 8 to 28 days (n = 1), 1 to 28 days (n = 11),  
 23 29 to 112 days (n = 10), and ≥113 days (n = 3) after donation. Samples were  
 24 collected from 7 donors who cleared the virus from 1 to 7 days (n = 7), 8 to 28  
 25 days (n = 1), 1 to 28 days (n = 8), 29 to 112 days (n = 4), and ≥113 days (n = 3)  
 26 after onset of symptoms. Dotted lines represent the cut-off levels for HEV antigen

27 and anti-HEV IgM/IgG values. The levels of HEV-related markers are presented  
28 as ranges (whiskers), interquartile ranges (boxes), and medians (lines within the  
29 boxes).

30

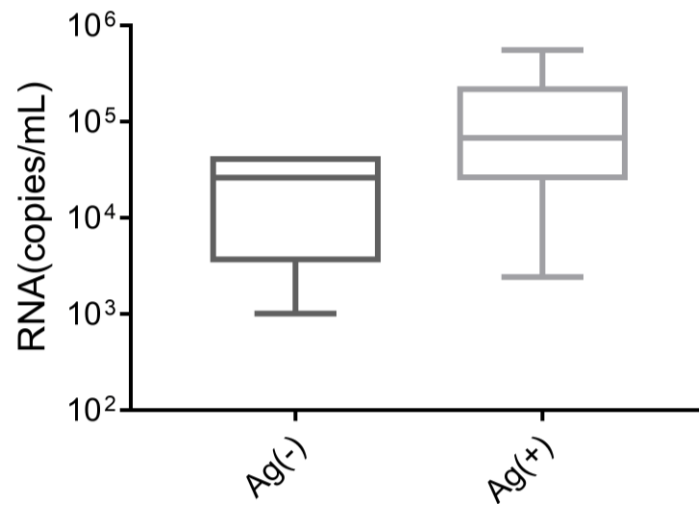

31

32 Figure S2. HEV RNA levels in donors with single HEV RNA positive (n=4) and  
33 both HEV RNA and antigen positive (n=11).
